# Supplementary material
Source: MDPI journal article supplement (https://www.mdpi.com/2073-4352/14/5/446)
Supplement: s1 [file s1]

Supplementary Data

# Structural Analysis of Xylose Isomerase from *Streptomyces avermitilis*

Ki Hyun Nam

College of General Education, Kookmin University, Seoul 02707, Republic of Korea; structure@kookmin.ac.kr

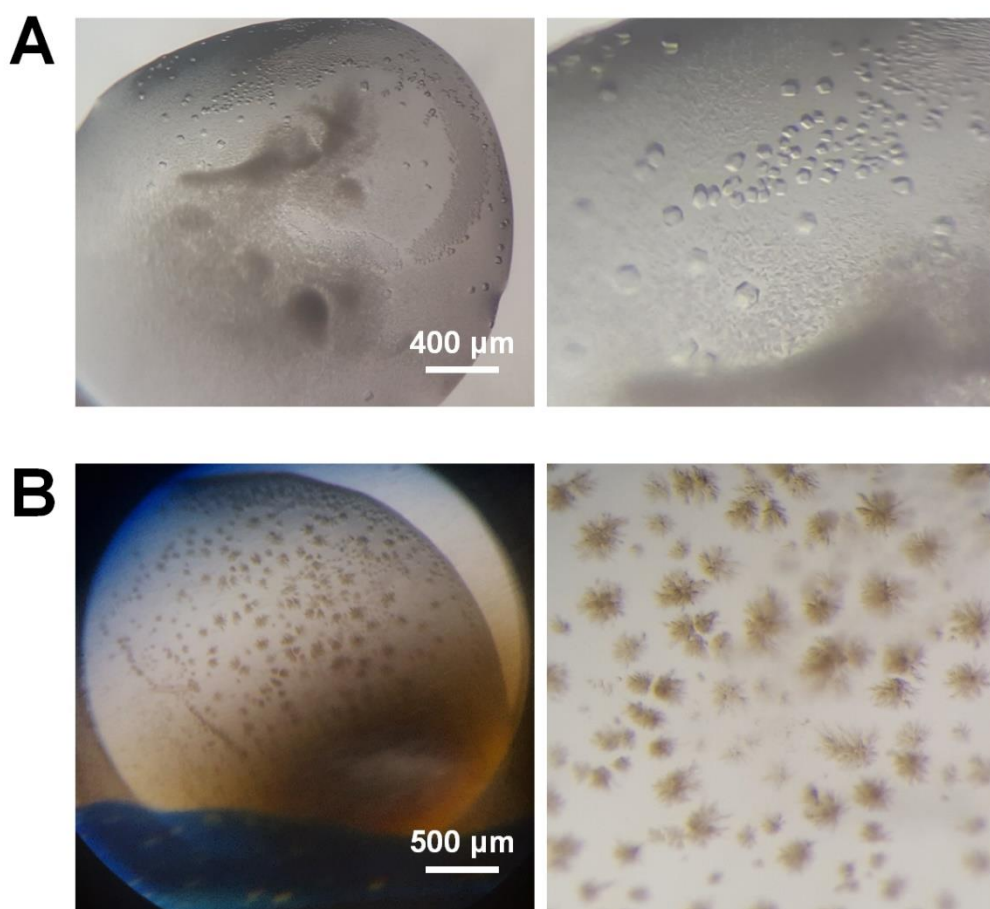

**Figure S1.** Photo of SavXI crystals grown under (A) 0.1 M Bis-Tris (pH 6.5) and 20% (w/v) polyethylene glycol monomethyl ether 5000 and (B) 0.1 M Bis-Tris (pH 6.5) and 45% (v/v) polypropylene glycol P400.

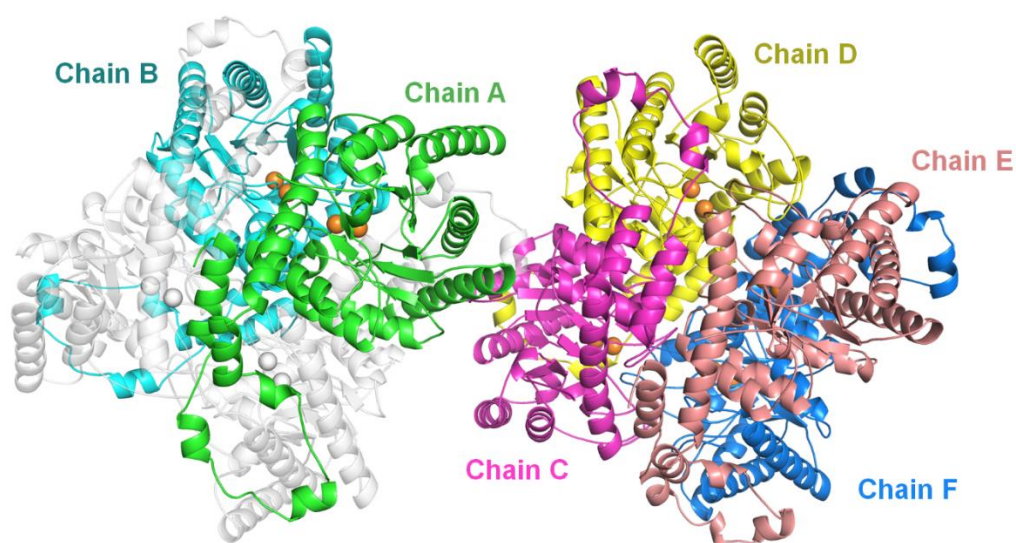

**Figure S2.** SavXI molecules (Chains A–F) in the asymmetric unit. Two SavXI molecules with symmetry coordinates in the crystal lattice are colored white.

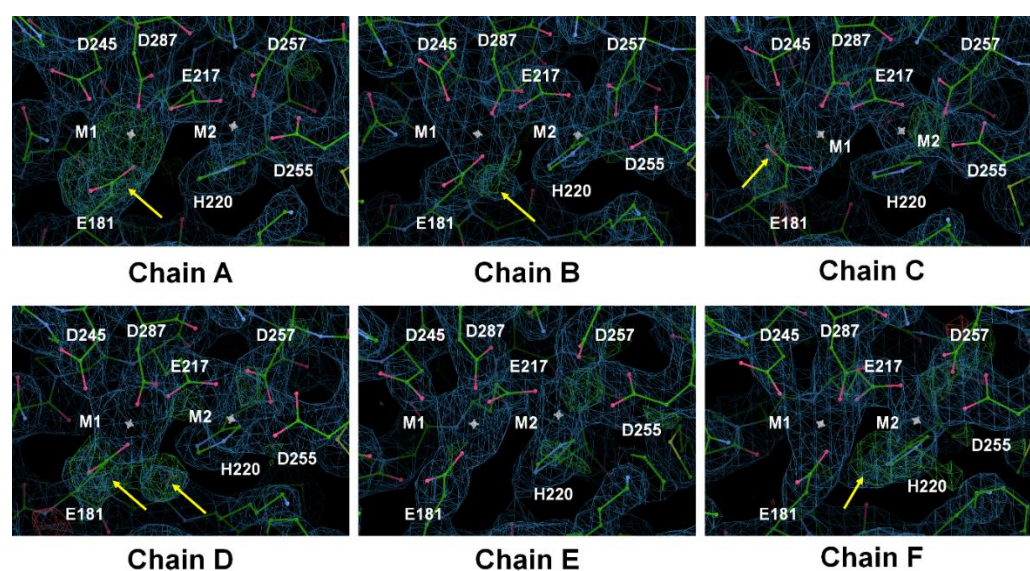

**Figure S3.** Unidentified 2Fo-Fc (blue mesh, 1 $\sigma$ ) and Fo-Fc (green mesh, 3 $\sigma$ ) electron density maps at the M1 site of SavXI.



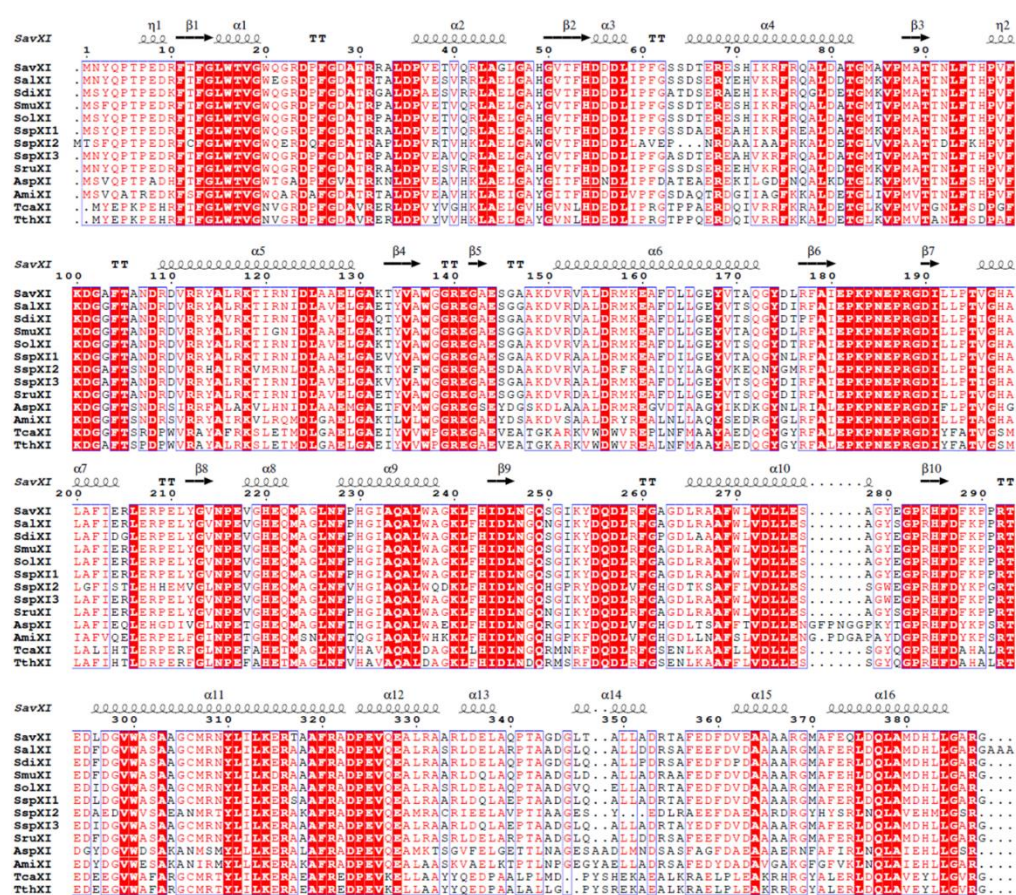

**Figure S4.** Structure-based amino acid sequence alignment of SavXI (UniProt: Q93HF3) with XI from *S. albus* (SalXI, P24299), *S. diastaticus* (SdiXI, P50910), *S. murinus* (SmuXI, P37031), *S. olivochromogenes* (SolXI, P15587), *Streptomyces* sp. F-1 (SspXI1, A0A1K2FKX8), *Streptomyces* sp. F-1 (SspXI2, A0A1K2FZ20), *Streptomyces* sp. SK (SspXI3, Q9ZAI3), *S. rubiginosus* (SruXI, P24300), *Arthrobacter* sp. strain NRRL B3728 (AspXI, P12070), *A. missouriensis* (AmiXI, P12851), *T. caldophilus* (TcaXI, P56681), and *T. thermophilus* HB8 (TthXI, P26997).

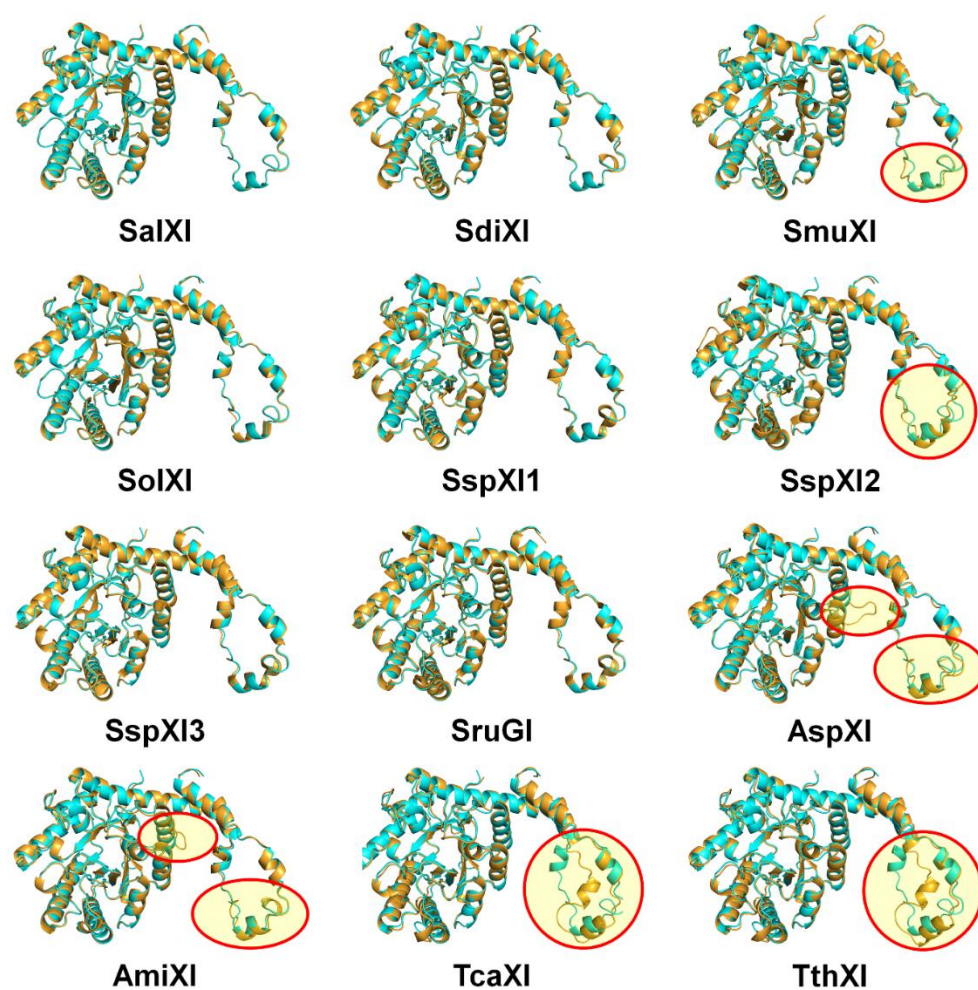

**Figure S5.** Superimposition of SavXI (cyan, Molecule A) with SalXI (PDB code: 6XIA), SdiXI (1CLK), SmuXI (1DXI), SolXI (1XYC), SspXI1 (6N99), SspXI2 (6N98), SspXI3 (4HHL), SruGI (5I7G), AspXI (1DID), AmiXI (1BHW), TcaXI (1BXC), and TthXI (1BXB). Significant regions with conformational differences are indicated by red circles.

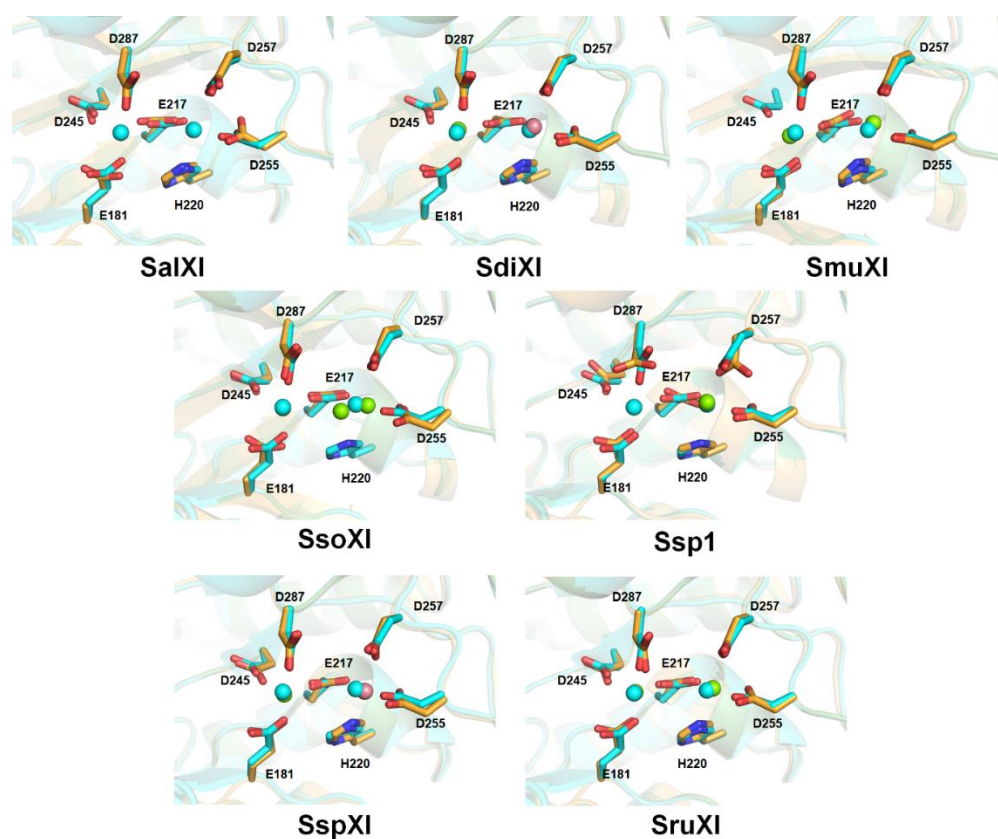

**Figure S6.** Superimposition of the metal binding site of SavXI (cyan) with SalXI (PDB code: 6XIA), SdiXI (1CLK), SmuXI (1DXI), SolXI (1XYC), SspXI1 (6N99), Ssp3XI (4HHL) and SruXI (5I7G).

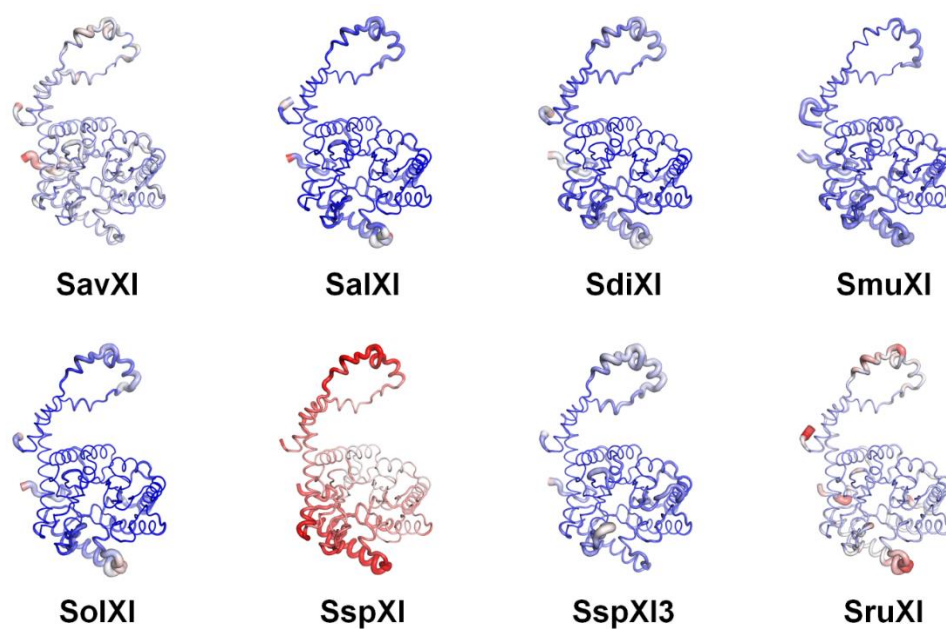

**Figure S7.** B-factor putty representation of SavXI (cyan), SalXI (PDB code: 6XIA), SdiXI (1CLK), SmuXI (1DXI), SolXI (1XYC), SspXI1 (6N99), Ssp3XI (4HHL) and SruXI (5I7G).



**Table S1.** Interaction between Molecule A and B (Chain C and Chain D).

| <b>Hydrogen bonds</b> |                 |                       |                       |                 |                       |
|-----------------------|-----------------|-----------------------|-----------------------|-----------------|-----------------------|
| <b>Chain C</b>        | <b>Distance</b> | <b>Chain D</b>        | <b>Chain C</b>        | <b>Distance</b> | <b>Chain D</b>        |
| <b>Residue [atom]</b> | <b>(Å)</b>      | <b>Residue [atom]</b> | <b>Residue [atom]</b> | <b>(Å)</b>      | <b>Residue [atom]</b> |
| Asn107 [O]            | 3.53            | Leu338 [N]            | Leu338 [N]            | 3.31            | Asn107 [O]            |
| Asp108 [OD1]          | 2.82            | Arg334 [NE]           | Arg368 [NH1]          | 3.76            | Asp108 [OD1]          |
| Asp108 [OD1]          | 2.63            | Arg334 [NH2]          | Arg334 [NE]           | 2.82            | Asp108 [OD1]          |
| Asp110 [OD1]          | 3.08            | Arg368 [NH2]          | Trp237 [NE1]          | 2.77            | Asp156 [OD1]          |
| Asp156 [OD1]          | 2.84            | Trp237 [NE1]          | Gly344 [N]            | 3.72            | Glu160 [OE2]          |
| Glu160 [OE1]          | 2.94            | Thr342 [N]            | Thr342 [N]            | 2.85            | Glu160 [OE2]          |
| Glu160 [OE2]          | 3.01            | Ala343 [N]            | Ala343 [N]            | 2.65            | Glu160 [OE2]          |
| Glu160 [OE2]          | 3.15            | Thr342 [N]            | Asn227 [ND2]          | 2.81            | Asp190 [OD1]          |
| Asp190 [OD1]          | 2.73            | Asn227 [ND2]          | Gln234 [NE2]          | 2.94            | His198 [O]            |
| Thr195 [OG1]          | 3.60            | Thr195 [OG1]          | Arg205 [NH1]          | 2.64            | Glu204 [OE1]          |
| His198 [O]            | 2.70            | Gln234 [NE2]          | Asn107 [ND2]          | 3.62            | Ala333 [O]            |
| Ala238 [O]            | 3.36            | Arg205 [NH1]          | Arg112 [NH2]          | 2.80            | Glu337 [O]            |
| Ala333 [O]            | 3.16            | Asn107 [ND2]          | Arg109 [N]            | 2.79            | Glu337 [OE2]          |
| Glu337 [O]            | 2.96            | Arg112 [NH2]          | Arg157 [NH1]          | 3.02            | Leu338 [O]            |
| Glu337 [O]            | 3.32            | Arg112 [NH1]          | Arg112 [NH2]          | 2.76            | Gln340 [O]            |
| Glu337 [OE2]          | 2.44            | Arg109 [N]            | Arg109 [NE]           | 2.70            | Pro341 [O]            |
| Leu338 [O]            | 2.90            | Arg157 [NH1]          | Arg109 [NH2]          | 3.14            | Thr342 [O]            |
| Gln340 [O]            | 2.67            | Arg112 [NH2]          | Arg113 [NH1]          | 2.66            | Thr342 [O]            |
| Thr342 [O]            | 2.92            | Arg113 [NH1]          | Arg112 [NE]           | 2.72            | Thr342 [OG1]          |
| Thr342 [O]            | 3.31            | Arg109 [NE]           | Arg113 [NH1]          | 3.08            | Asp345 [OD1]          |
| Thr342 [OG1]          | 2.86            | Arg112 [NE]           | Arg113 [NH2]          | 2.71            | Asp345 [OD1]          |
| Asp345 [OD1]          | 3.22            | Arg113 [NH1]          | Arg117 [NH1]          | 2.86            | Leu350 [O]            |
| Asp345 [OD1]          | 3.30            | Arg113 [NH2]          | Arg117 [NH1]          | 2.46            | Asp353 [O]            |
| Leu350 [O]            | 2.73            | Arg117 [NH1]          | Arg113 [NH2]          | 3.66            | Asp353 [OD1]          |
| Asp353 [O]            | 2.71            | Arg117 [NH1]          | Arg117 [NH2]          | 3.55            | Glu358 [OE1]          |
| Asp353 [OD1]          | 3.01            | Arg113 [NH2]          | His96 [NE2]           | 3.19            | Glu363 [OE2]          |
| Glu358 [OE2]          | 3.26            | Arg117 [NH2]          | Lys100 [NZ]           | 3.32            | Ala366 [O]            |
| Glu363 [OE2]          | 3.10            | His96 [NE2]           | Lys100 [NZ]           | 2.59            | Arg368 [O]            |
| Arg368 [O]            | 2.96            | Lys100 [NZ]           |                       |                 |                       |
| <b>Salt bridges</b>   |                 |                       |                       |                 |                       |
| <b>Chain C</b>        | <b>Distance</b> | <b>Chain D</b>        | <b>Chain C</b>        | <b>Distance</b> | <b>Chain D</b>        |
| <b>Residue [atom]</b> | <b>(Å)</b>      | <b>Residue [atom]</b> | <b>Residue [atom]</b> | <b>(Å)</b>      | <b>Residue [atom]</b> |
| Asp108 [OD1]          | 2.82            | Arg334 [NE]           | Arg368 [NH1]          | 3.76            | Asp108 [OD1]          |
| Asp108 [OD1]          | 3.66            | Arg334 [NH2]          | Arg334 [NE]           | 2.82            | Asp108 [OD1]          |
| Asp108 [OD1]          | 3.39            | Arg334 [NE]           | Arg334 [NH2]          | 3.21            | Asp108 [OD1]          |
| Asp108 [OD1]          | 2.63            | Arg334 [NH2]          | Arg334 [NH2]          | 3.89            | Asp108 [OD1]          |
| Asp110 [OD1]          | 3.08            | Arg368 [NH2]          | Arg205 [NH1]          | 2.64            | Glu204 [OE1]          |
| Glu204 [OE1]          | 3.44            | Arg205 [NH2]          | Arg205 [NH2]          | 3.08            | Glu204 [OE1]          |
| Glu204 [OE2]          | 3.54            | Arg205 [NH2]          | Arg205 [NH2]          | 3.03            | Glu204 [OE2]          |
| Asp345 [OD1]          | 3.22            | Arg113 [NH1]          | Arg113 [NH1]          | 3.08            | Asp345 [OD1]          |
| Asp345 [OD1]          | 3.64            | Arg113 [NH1]          | Arg113 [NH2]          | 3.94            | Asp345 [OD1]          |
| Asp345 [OD1]          | 3.30            | Arg113 [NH2]          | Arg113 [NH1]          | 3.25            | Asp345 [OD1]          |
| Asp353 [OD1]          | 3.95            | Arg113 [NE]           | Arg113 [NH2]          | 2.71            | Asp345 [OD1]          |
| Asp353 [OD1]          | 3.01            | Arg113 [NH2]          | Arg113 [NE]           | 3.96            | Asp353 [OD1]          |
| Glu358 [OE2]          | 3.26            | Arg117 [NH2]          | Arg113 [NH2]          | 3.66            | Asp353 [OD1]          |
| Glu363 [OE1]          | 3.93            | His96 [NE2]           | Arg117 [NH2]          | 3.55            | Glu358 [OE1]          |
| Glu363 [OE2]          | 3.10            | His96 [NE2]           | His96 [NE2]           | 3.19            | Glu363 [OE2]          |

**Table S2.** Interaction between Molecule A and D (Chain C and Chain F).

| Hydrogen bonds            |                 |                           |                           |                 |                           |
|---------------------------|-----------------|---------------------------|---------------------------|-----------------|---------------------------|
| Chain C<br>Residue [atom] | Distance<br>(Å) | Chain E<br>Residue [atom] | Chain E<br>Residue [atom] | Distance<br>(Å) | Chain E<br>Residue [atom] |
| Thr293 [O]                | 3.13            | Met370 [N]                | Phe372 [N]                | 3.13            | Glu294 [OE1]              |
| Glu294 [OE1]              | 3.26            | Phe372 [N]                | Phe372 [N]                | 3.34            | Glu294 [OE2]              |
| Glu294 [OE2]              | 3.48            | Phe372 [N]                | Gln377 [NE2]              | 2.77            | Asn309 [OD1]              |
| Asn309 [OD1]              | 2.66            | Gln377 [NE2]              | Ser302 [OG ]              | 2.81            | Glu373 [OE1]              |
| Glu373 [OE2]              | 3.35            | Ser302 [OG]               | Arg259 [NH1]              | 3.00            | Glu373 [OE1]              |
| Glu373 [OE2]              | 2.66            | Arg259 [NH1]              | Arg259 [NH2]              | 2.85            | Asp376 [OD1]              |
| Asp376 [OD1]              | 2.23            | Arg259 [NH2]              | Arg259 [NH1]              | 2.97            | Asp376 [OD1]              |
| Gln377 [OE1]              | 3.10            | Arg259 [NE]               | Arg259 [NE]               | 2.65            | Gln377 [OE1]              |
| Gln377 [OE1]              | 3.32            | Asn309 [ND2]              | Asn309 [ND2]              | 3.32            | Gln377 [OE1]              |
| Asp381 [OD1]              | 2.93            | Arg308 [NE]               | Asn309 [ND2]              | 3.82            | Met380 [SD]               |
| Leu384 [O]                | 2.79            | Arg316 [NH1]              | Arg308 [NE]               | 3.23            | Asp381 [OD1]              |
| Ala386 [O]                | 2.77            | Arg308 [NH2]              | Arg316 [NH1]              | 2.61            | Leu384 [O]                |
| Met370 [N]                | 2.97            | Thr293 [O]                | Arg308 [NH2]              | 2.55            | Ala386 [O]                |
| Salt bridges              |                 |                           |                           |                 |                           |
| Chain C<br>Residue [atom] | Distance<br>(Å) | Chain E<br>Residue [atom] | Chain C<br>Residue [atom] | Distance<br>(Å) | Chain E<br>Residue [atom] |
| Glu373 [OE1]              | 3.80            | Arg259 [NH1]              | Arg259 [NH1]              | 3.00            | Glu373 [OE1]              |
| Glu373 [OE2]              | 2.66            | Arg259 [NH1]              | Arg259 [NH1]              | 3.59            | Glu373 [OE2]              |
| Asp376 [OD1]              | 3.94            | Arg259 [NH1]              | Arg259 [NH2]              | 2.85            | Asp376 [OD1]              |
| Asp376 [OD1]              | 2.23            | Arg259 [NH2]              | Arg259 [NH1]              | 2.97            | Asp376 [OD1]              |
| Asp381 [OD1]              | 2.93            | Arg308 [NE]               | Arg308 [NE]               | 3.23            | Asp381 [OD1]              |
| Asp381 [OD1]              | 3.36            | Arg308 [NH2]              | Arg308 [NH2]              | 3.81            | Asp381 [OD1]              |
| Asp381 [OD1]              | 3.35            | Arg308 [NE]               | Arg308 [NE]               | 3.43            | Asp381 [OD1]              |
| Asp381 [OD1]              | 3.62            | Arg308 [NH2]              | Arg308 [NH2]              | 3.84            | Asp381 [OD1]              |

**Table S3.** Interaction between Molecule A and B (Chain C and Chain D).

| Hydrogen bonds            |                 |                           |                           |                 |                           |
|---------------------------|-----------------|---------------------------|---------------------------|-----------------|---------------------------|
| Chain C<br>Residue [atom] | Distance<br>(Å) | Chain F<br>Residue [atom] | Chain C<br>Residue [atom] | Distance<br>(Å) | Chain F<br>Residue [atom] |
| Thr95 [O]                 | 2.89            | Asp28 [N]                 | Arg140 [NH2]              | 3.05            | Asp24 [OD1]               |
| Phe 26 [O]                | 3.56            | Thr95 [OG1]               | Arg140 [NH1]              | 2.73            | Asp24 [OD1]               |
| Thr293 [O]                | 3.37            | Lys100 [NZ]               | Thr95 [OG1]               | 2.86            | Phe26 [O]                 |
| Asp24 [OD1]               | 2.60            | Arg140 [NH1]              | Asp28 [N]                 | 3.16            | Thr95 [O]                 |
| Asp24 [OD1]               | 3.09            | Arg140 [NH2]              | Arg292 [NH2]              | 3.85            | Thr95 [O]                 |
| Phe 26 [O]                | 2.75            | Arg140 [NH2]              | Tyr254 [OH]               | 3.35            | Pro187 [O]                |
| Asp190 [OD1]              | 3.50            | Lys253 [NZ]               | Lys253 [NZ]               | 2.73            | Gly189 [O]                |
| Gly189 [O]                | 3.25            | Lys253 [NZ]               | Lys253 [NZ]               | 3.49            | Asp190 [OD1]              |
| Pro187 [O]                | 3.68            | Tyr254 [OH]               | Lys100 [NZ]               | 3.41            | Thr293 [O]                |
| Salt bridges              |                 |                           |                           |                 |                           |
| Chain C<br>Residue [atom] | Distance<br>(Å) | Chain F<br>Residue [atom] | Chain C<br>Residue [atom] | Distance<br>(Å) | Chain F<br>Residue [atom] |
| Asp24 [OD1]               | 3.97            | Arg140 [NH1]              | Arg140 [NH2]              | 3.05            | Asp24 [OD1]               |
| Asp24 [OD1]               | 2.60            | Arg140 [NH1]              | Arg140 [NH1]              | 2.73            | Asp24 [OD1]               |
| Asp24 [OD1]               | 3.09            | Arg140 [NH2]              | Arg140 [NH2]              | 3.08            | Asp24 [OD1]               |
| Asp24 [OD1]               | 3.08            | Arg140 [NH2]              | Lys253 [NZ]               | 3.49            | Asp190 [OD1]              |
| Asp190 [OD1]              | 3.50            | Lys253 [NZ]               |                           |                 |                           |

**Table S4.** Distance between metal-binding sites and key residues.

| Metal     | Residue | Molecule |      |      |      |      |      |
|-----------|---------|----------|------|------|------|------|------|
|           |         | A        | B    | C    | D    | E    | F    |
| <b>M1</b> | Glu181  | 1.90     | 1.84 | 2.14 | 1.95 | 1.76 | 2.07 |
|           | Glu217  | 2.45     | 2.55 | 2.28 | 2.31 | 1.69 | 2.29 |
|           | Asp245  | 2.62     | 2.18 | 3.08 | 2.69 | 2.77 | 2.30 |
|           | Asp287  | 1.80     | 2.06 | 1.73 | 1.78 | 2.21 | 2.07 |
|           | His45   | 6.85     | 7.08 | 6.71 | 6.95 | 7.11 | 6.92 |
| <b>M2</b> | Glu217  | 1.89     | 2.56 | 2.45 | 1.95 | 2.31 | 2.71 |
|           | His220  | 2.83     | 2.80 | 3.46 | 2.55 | 2.59 | 2.91 |
|           | Asp255  | 1.86     | 2.57 | 2.47 | 2.10 | 2.52 | 2.39 |
|           | Asp257  | 2.55     | 2.65 | 2.79 | 2.67 | 3.16 | 3.17 |
|           | Lys183  | 4.62     | 4.54 | 4.52 | 4.59 | 4.15 | 4.68 |

**Table S5.** Coordination angle for metal-binding sites.

| Metal     | Residue          | Molecule (°) |       |      |      |      |       |
|-----------|------------------|--------------|-------|------|------|------|-------|
|           |                  | A            | B     | C    | D    | E    | F     |
| <b>M1</b> | Glu181-M1-Asp245 | 104.7        | 97.8  | 99.6 | 85.7 | 80.2 | 108.6 |
|           | Glu181-M1-Glu217 | 90.0         | 76.7  | 96.8 | 84.5 | 97.1 | 77.3  |
|           | Asp245-M1-Asp287 | 88.2         | 100.6 | 72.3 | 99.3 | 88.9 | 97.9  |
|           | Glu217-M1-Asp287 | 84.3         | 87.7  | 89.4 | 87.0 | 93.0 | 81.3  |
| <b>M2</b> | Glu217-M2-His220 | 80.3         | 61.1  | 59.4 | 78.6 | 66.5 | 62.2  |
|           | Glu217-M2-Asp257 | 79.7         | 69.5  | 70.8 | 74.3 | 64.6 | 65.0  |
|           | His220-M2-Asp255 | 94.9         | 75.3  | 69.2 | 94.7 | 81.2 | 76.8  |
|           | Asp255-M2-Asp257 | 82.6         | 75.7  | 70.6 | 87.8 | 61.0 | 56.2  |
